# Supplementary material for: NMR studies of zinc binding in a multi-histidinic peptide fragment
Source: Royal Society of Chemistry journal article supplement (doi:10.1039/b914296g), 2009-11-27

## Supplementary material

**Fig. S1**

(A)  $^1\text{H}$  1D spectra of aromatic and (B) aliphatic region of the free 9aa peptide (orange) and in the presence of 0.5 (green) and 1.0 (blue) equiv of  $\text{Zn(II)}$  at pH 6.1. The insets show the expanded  $^1\text{H}$ -NMR spectrum of the most affected proton signals: HN (a) and  $\text{H}_{\delta 2}$  of  $\text{H}_6$  (b),  $\text{Q}_\gamma$  of  $\text{T}_7$  (c) and  $\text{Q}_\gamma$  of  $\text{E}_9$  (d), respectively.

Fig. S1(A)

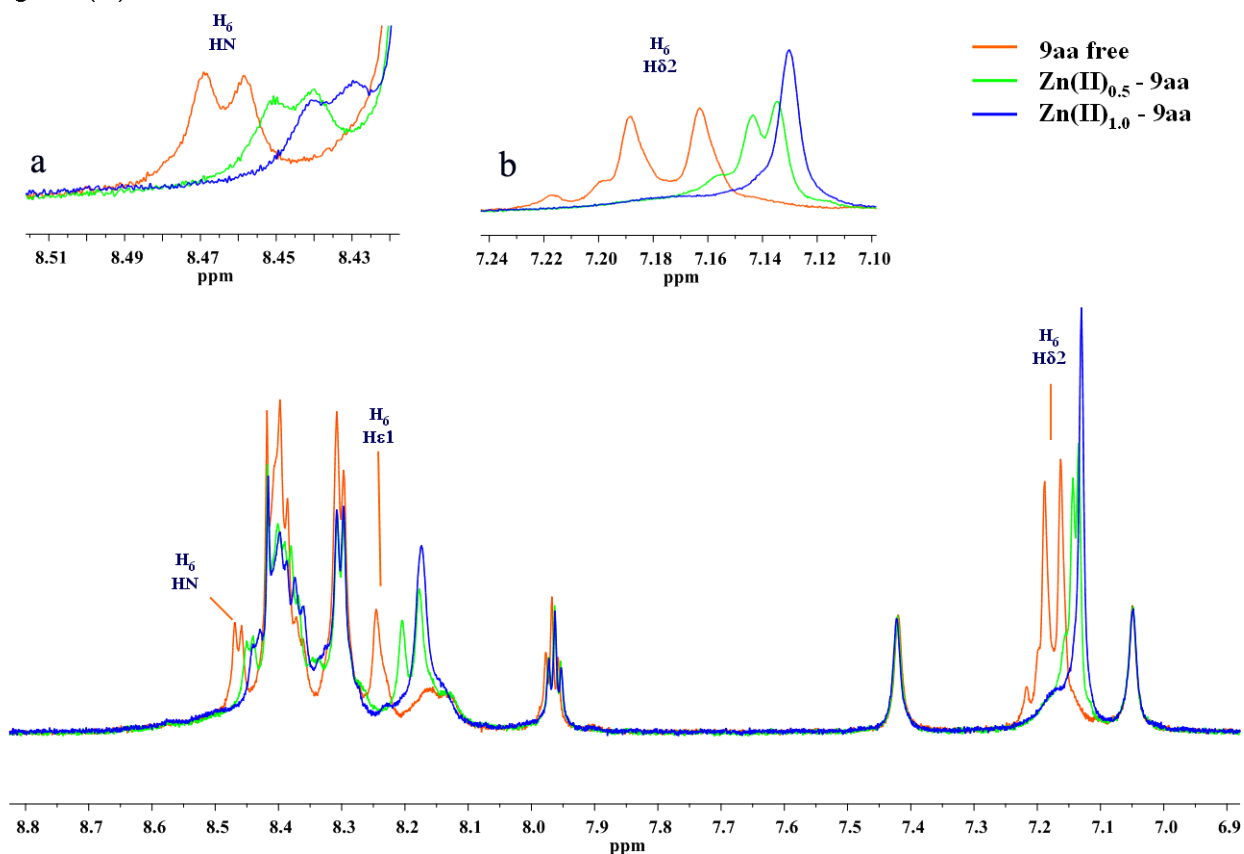

Fig. 1S(B)

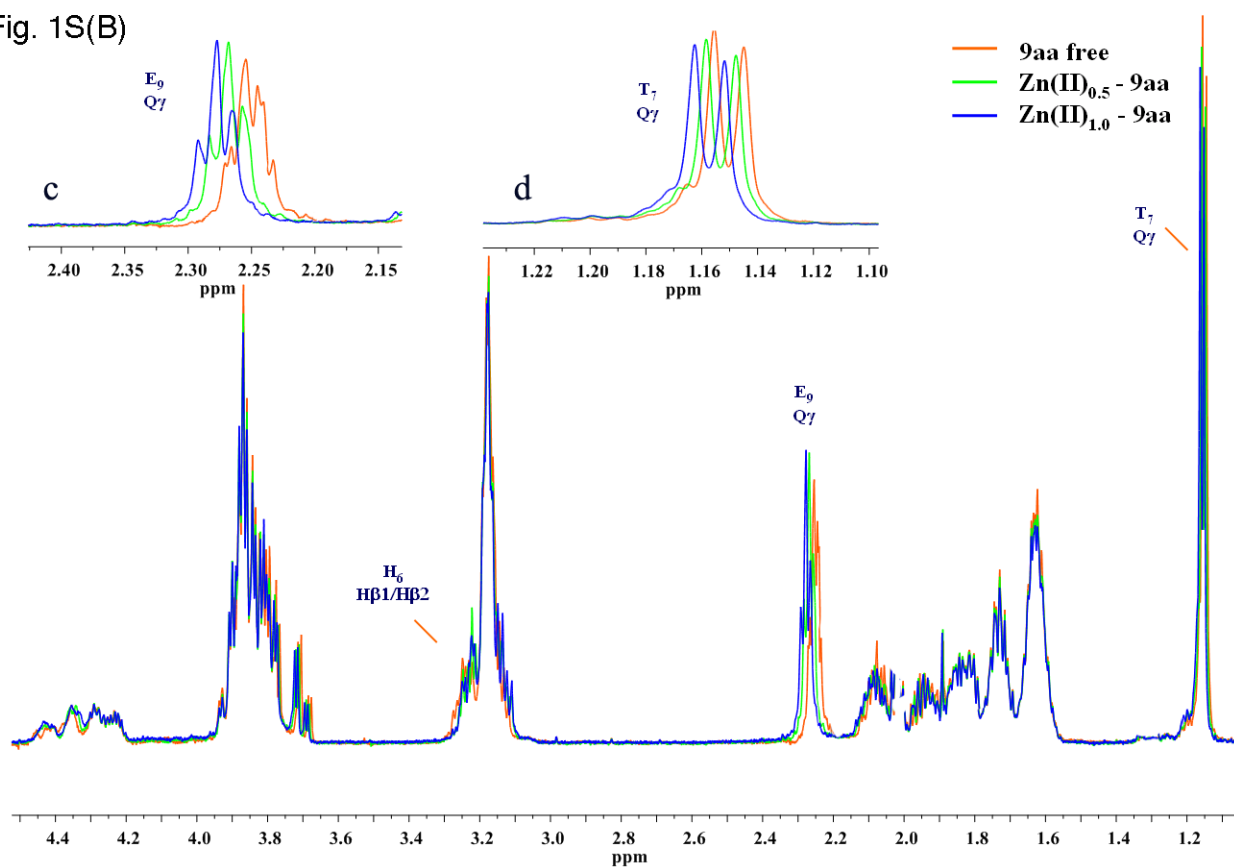

Supplement: b914296g.pdf [file b914296g.pdf]
